# Supplementary material for: Ferroelectric monodisperse Ln-doped barium titanate cuboidal nanocrystals prepared by a solvothermal route
Source: Royal Society of Chemistry journal article supplement (doi:10.1039/d2ce00770c), 2022-01-01
Supplement: d2ce00770c1.pdf [file d2ce00770c1.pdf]

## Supporting Information

### **Ferroelectric monodisperse Ln-doped barium titanate cuboidal nanocrystals prepared by a solvothermal route**

Benard D. Kavey<sup>1,2</sup> Daniela Caruntu<sup>1,2,3</sup>, Vasyl Mykhailovych<sup>3,4</sup> and Gabriel Caruntu<sup>1,2,3</sup>

<sup>1</sup>Department of Chemistry and Biochemistry, Central Michigan University, 1200,  
S. Franklin St., Mt. Pleasant, MI 48858, USA

<sup>2</sup>Science of Advanced Materials (SAM) Program, Central Michigan University, 1200,  
S. Franklin St., Mt. Pleasant, MI 48858, USA

<sup>3</sup>Department of Electrical Engineering and Computer Science and MANSID Research Center,  
“Stefan Cel Mare” University, 13, Universitatii St. Suceava, 720229, Romania

<sup>4</sup>Department of General Chemistry and Material Science, Yuriy Fedkovych Chernivtsi National  
University, 2, Kotsjubynskyi St., 58012, Chernivtsi, Ukraine

\*Corresponding author: [g.caruntu@cmich.edu](mailto:g.caruntu@cmich.edu)

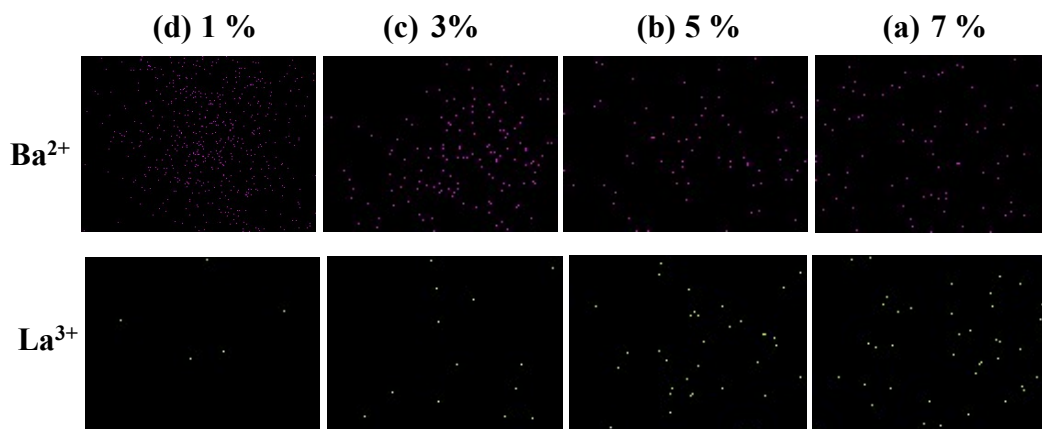

Figure S1. TEM-EDS maps of (a) 1 %, (b) 3 %, (c) 5 %, and (d) 7 % La-doped BaTiO<sub>3</sub> nanocrystals. As expected, the intensity of the signals in the maps relatively increases with increasing La concentration

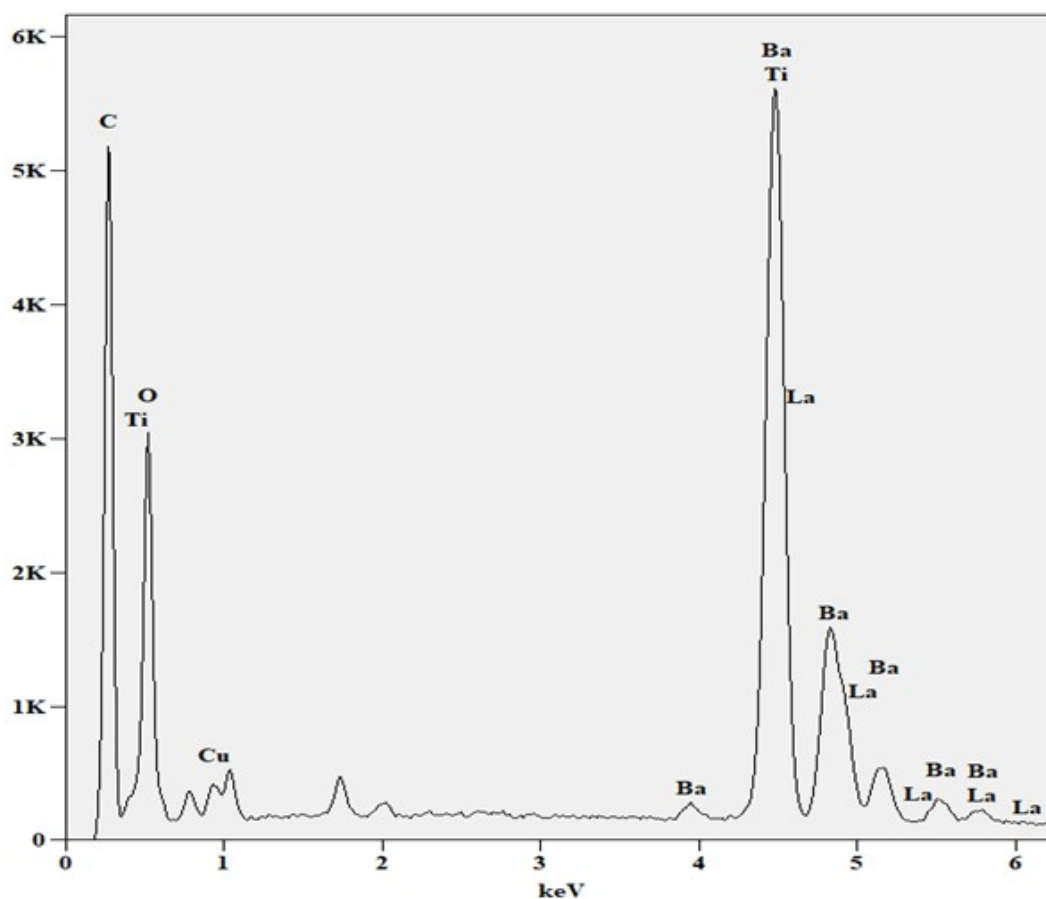

Figure S2. TEM-EDS spectra of 5% La-doped BaTiO<sub>3</sub> nanocrystals

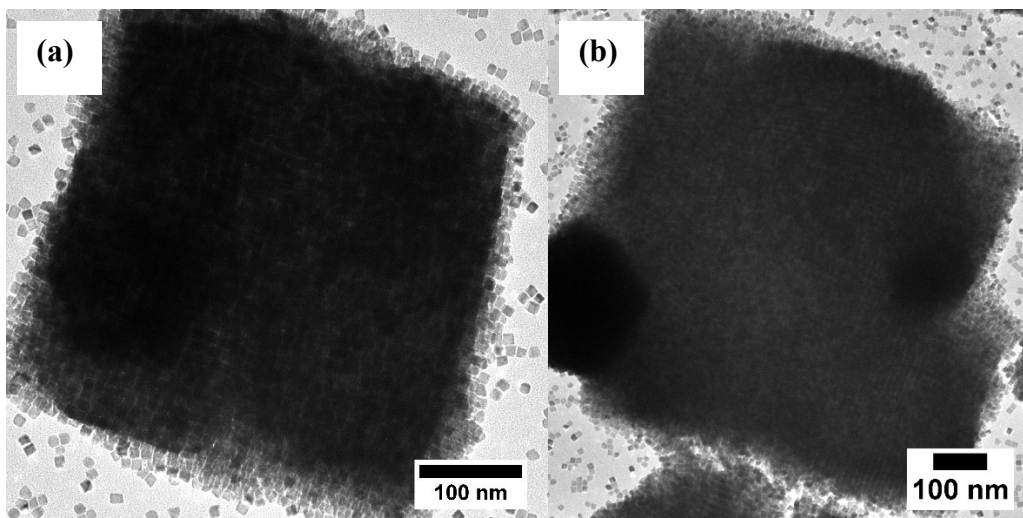

Figure S3. TEM micrographs of superparticles fabricated by using solvent-assisted assembly of 5 % La-doped BaTiO<sub>3</sub> nanocrystals. As seen in the micrographs, the cross-section of the superparticles was estimated to be; (a) 0.75 microns, and (b) 0.80 microns

The superparticles were fabricated by dispersing 60.00 mg of the as-prepared 5% La-doped BaTiO<sub>3</sub> wet powder in 1-pentanol and hexane mixture (1-pentanol/hexane; 2.5 volume ratio). The resulting solution was sonicated for 10 minutes and allowed to stand for 24 h. A volume of 2.0 mL of the supernatant colloidal dispersion was collected and transferred into a 5.0 mL scintillation vial. A TEM copper-grid was inserted and the solution was covered with a filter paper and allowed to stand for 16 h to allow for slow evaporation of the 1-pentanol/hexane solvent at room temperature. The copper-grid template was collected for imaging.

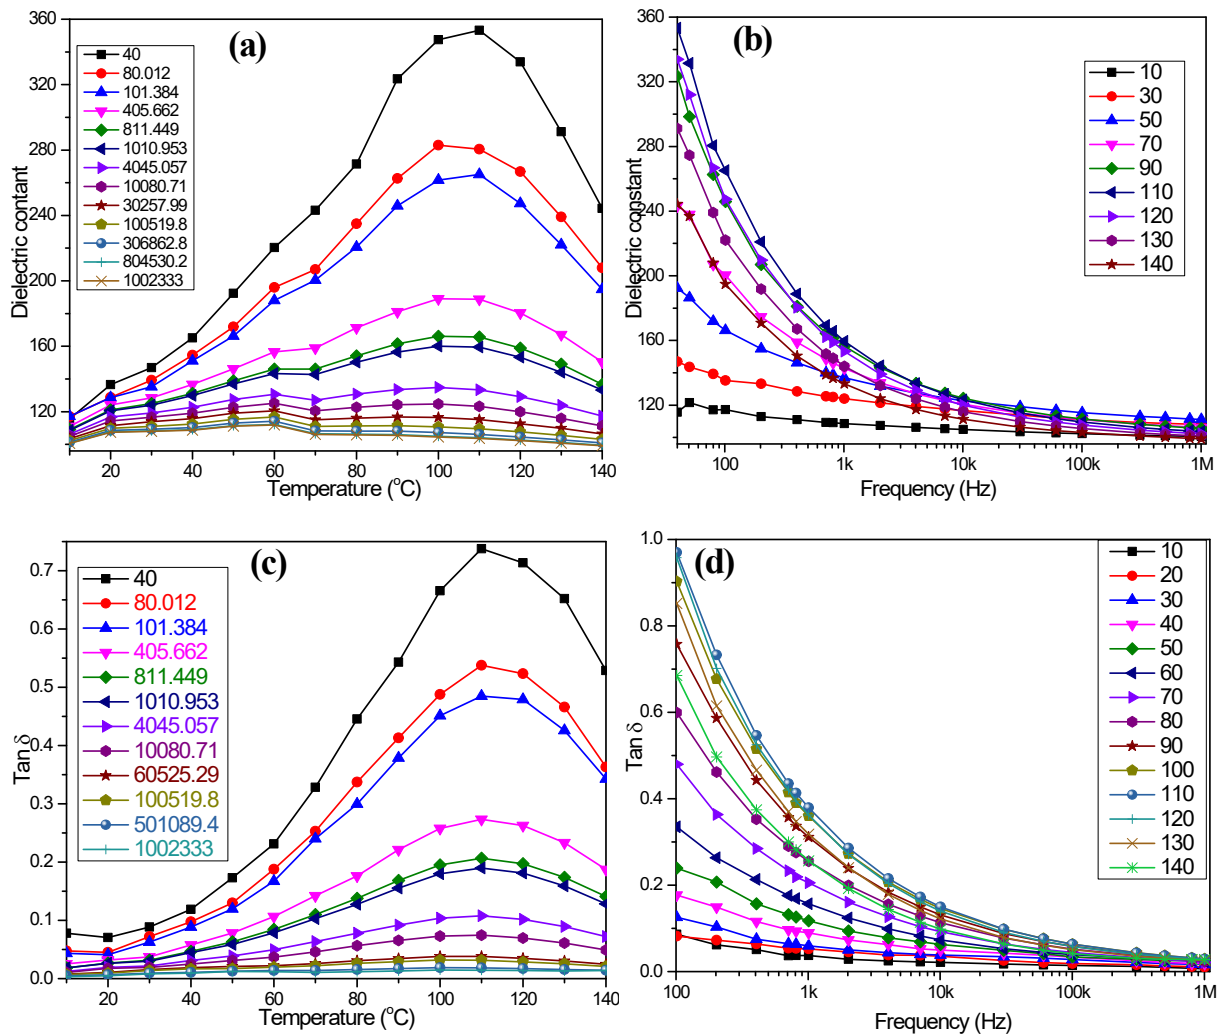

Figure S4. Dielectric spectroscopy of 5% La-doped BaTiO<sub>3</sub> nanocrystals pelletized samples as a function of temperature and frequency. Figures a, and b show the plot of dielectric constant as a function of temperature and frequency whereas figures b, and c show the plot of the dissipation factor ( $\tan \delta$ ) with temperature and frequency
